# Supplementary material for: Clinical and Imaging Characteristics of Smear Negative Pulmonary Tuberculosis Patients: A Comparative Study
Source: Pulm Med. 2024 Mar 6;2024:2182088. doi: 10.1155/2024/2182088 (PMC10937078; doi:10.1155/2024/2182088)
Supplement: Supplementary 1 — Figure S1. Diagnostic algorithm of presumptive pulmonary TB patients (adapted from the National TB Program Guideline, Ministry of Health, Ethiopia, 2017). [file 2182088.f1.docx]

| Two AFB negative result]  1In seriously sick patients for whom “HIV test is not done”, available investigations including Xpert, CXR and HIV testing may be done in one -go to avoid delays and save patients’ lives as such patients are advised to be managed at Hospital level.  2Liquid specimens from EPTB site may be subjected to Xpert test without additional processing.  3Broad spectrum antimicrobials excluding fluroquinolone or anti-TB drugs is to be given for 10- 14 days  4One RR-TB Xpert result in population groups with low DR-TB risk (<5%) needs to be repeated on fresh specimen, if repeat test detects RR-TB; link to TIC for second line Anti-TB; if repeat test only detects MTB but not RR-TB; initiate first-line Anti-TB treatment and monitor response.  =>Consider alternative Dx and treatr4  =>if seriously sick, refer for Xpert, CXR, pathology & Consult expert for “Clinical TB Dx’’  =>P/Pos TB  =>Link to TB clinic for TB Rx  =>Do FL-DST at base line using Xpert or FL- LPA  -Repeat Xpert if test result is in error; OR if MTB is not detected: Consider alternative Dx & treat3-if seriously sick, consult expert for “clinical TB Dx”  Give two sputum samples on spot for AFB  B (30-60 minutes apart)  Give three sputum samples (two on spot for AFB microscopy and send one for Xpert testing   - Patients with documented HIV infection - Seriously Sick patients1 - Children’s 2-4yrs of age - Prior TB treatment history - Contact history with RR/MDRTB patients (presumed proven) - Patients from congregated settings or health facilities - Presumed extrapulmonary TB2   Give one sputum for Xpert  Access to same day Xpert service  One or more AFB positive  MTB detected  MTB not detected  RR TB detected  Presumptive TB case |
| --- |

*AFS: Acid Fast Staining, CXR: Chest X-Ray, Dx: Diagnosis, Fl- DST: Fist Line-Drug Sensitivity Testing, FL-LPA: First Line -Line Probe Assay, TIC: Treatment Initiation Center, Rif: Rifampicin, RR: Rifampicin Resistant*

=> Repeat Xpert and decide on final diagnosis; patients4

=> treat as RR-TB at TIC if RR-TB is detected in patients with prior TB Rx
